# Supplementary material for: Investigation on the acquisition of scientific competences during medical studies and the medical doctoral thesis
Source: PubMed Central journal article supplement (PMC6022582; doi:10.3205/zma001167), 2018-05-15
Supplement: JME-35-20-s-001.pdf [file JME-35-20-s-001.pdf]

| Main Categories                                                  | Subcategories                                                                                                                                                                                                                                                                                                                                                                                                         |
|------------------------------------------------------------------|-----------------------------------------------------------------------------------------------------------------------------------------------------------------------------------------------------------------------------------------------------------------------------------------------------------------------------------------------------------------------------------------------------------------------|
| Acquisition of research competences during medical studies       | <ul style="list-style-type: none"> <li>low</li> <li>medium</li> <li>high</li> </ul>                                                                                                                                                                                                                                                                                                                                   |
| Lack of research competences after and during the doctoral phase | <ul style="list-style-type: none"> <li>clinical experience</li> <li>knowledge of research literature</li> <li>methodical competence</li> <li>ability to manage and plan a research project</li> <li>scientific writing</li> <li>scientific English</li> <li>presenting research results</li> <li>writing grant proposals</li> <li>supervision of doctoral candidates</li> <li>social skills</li> <li>other</li> </ul> |
| Reasons for the lack of competences                              | <ul style="list-style-type: none"> <li>unrealistic at that time</li> <li>context of the doctoral project</li> <li>no opportunities</li> <li>own abilities</li> <li>learning opportunities were not taken despite being interested</li> <li>learning opportunities were not taken because of a lack of interest</li> <li>other</li> </ul>                                                                              |
| New competences after the doctorate                              | <ul style="list-style-type: none"> <li>general increase in competences clinical experience</li> <li>knowledge of research literature</li> <li>methodical competence</li> <li>project planning</li> <li>scientific writing</li> </ul>                                                                                                                                                                                  |

---

|                                                                          |                                                                                                                                                                                                      |
|--------------------------------------------------------------------------|------------------------------------------------------------------------------------------------------------------------------------------------------------------------------------------------------|
|                                                                          | scientific English<br>publication process<br>presenting of research results<br>writing grant proposals<br>scientific thinking and reasoning<br>social skills<br>other                                |
| Which factors were important for the development of research competences | encouragement from the supervisor<br>encouragement from other people<br>exchange of thoughts and ideas with other scientists<br>own motivation<br>amount of own efforts<br>seminars/courses<br>other |
| Relevance of acquired competences for (future) career                    | rather irrelevant<br>rather relevant<br>highly relevant                                                                                                                                              |

---
